# Supplementary material for: Advancing Exposure Science through Chemical Data Curation and Integration in the Comparative Toxicogenomics Database
Source: PubMed Central journal article supplement (PMC5047769; doi:10.1289/ehp174), 2016-05-12
Supplement: EHP174.s001.acco.pdf [file EHP174.s001.acco.pdf]

**Note to readers with disabilities:** *EHP* strives to ensure that all journal content is accessible to all readers. However, some figures and Supplemental Material published in *EHP* articles may not conform to [508 standards](#) due to the complexity of the information being presented. If you need assistance accessing journal content, please contact [ehp508@niehs.nih.gov](mailto:ehp508@niehs.nih.gov). Our staff will work with you to assess and meet your accessibility needs within 3 working days.

## **Supplemental Material**

### **Advancing Exposure Science through Chemical Data Curation and Integration in the Comparative Toxicogenomics Database**

Cynthia J. Grondin, Allan Peter Davis, Thomas C. Wieggers, Benjamin L. King, Jolene A. Wieggers, David M. Reif, Jane A. Hoppin and Carolyn J. Mattingly

#### **Table of Contents**

**Part 1.** Agricultural Health Study

**Part 2.** CTD Set Analyzer tool

**Part 3.** CTD MyVenn tool

**Table S1.** Key data fields and counts for CTD exposure curation

References

**Part 1** Agricultural Health Study (AHS) (Alavanja et al. 1996). Following standard curation practices (Davis et al. 2011), interactions between chemical stressors and diseases in AHS papers were coded for type of relationship and significance in exposure statements. Each exposure statement describes a single interaction between a single stressor and a single outcome. When authors provided statistically significant evidence of a disease outcome as a result of a chemical exposure (author metrics varied, but often included odds ratios, relative risks, P-values and confidence intervals), this was curated as a positive or negative interaction between a stressor and disease outcome as appropriate. Interactions that showed a positive or negative trend that did not reach statistical significance (P-trend) were curated as hypothetical/predictive. Interactions that lacked correlation, as concluded by the authors, were coded as null interactions. In cases where the relationship between a stressor and outcome was evaluated but the results were inconclusive, the result was not recorded. All interactions between a single stressor and disease were sorted, counted, assigned a numerical value to represent the relationship, and visualized as a matrix; greater than two positive interactions were assigned a value of five, those with 1-2 positive interactions were assigned a value of two, single positive interactions combined with single negative interactions were assigned a value of 0.1, no interactions were assigned a value of 0, null interactions were assigned a value of -0.1, and negative interactions were assigned a value of -2. Because many stressor-disease combinations had multiple interactions, a single value was designated to best represent a consensus of curated literature. For heatmap analysis (Figure 4), hypothetical/predictive interactions were included with positive correlations. The R/ComplexHeatmap package was used for single linkage clustering of diseases by class, and then within class, by frequency.

**Part 2** CTD *Set Analyzer* tool. To examine how integration of exposure data with CTD can add biological context to exposure information, we examined the set of 21 genes (Figure 5B) that interacted with 3 or more of the 16 AHS pesticides that have an association with Prostatic Neoplasms, and together form a gene-gene interaction network. Using CTD's SetAnalyzer tool, (<http://ctdbase.org/tools/analyzer.go?q>), 'Genes' were selected as the input type in part 1, the list of 21 genes were entered as the data set in part 2, 'Enriched Diseases' were selected as the type of analysis in part 3, and a threshold of 0.01 was entered as the corrected p-value in part 4.

**Part 3** CTD *MyVenn* tool. CTD's *MyVenn* tool was used to examine how CTD core and exposure data sets complement each other and inform additional analyses for 18 AHS pesticides (aldrin, atrazine, butylate, carbofuran, chlorpyrifos, coumaphos, diazinon, dichlorvos, EPTC, fonofos, glyphosate, malathion, methyl bromide, metribuzin, parathion, permethrin, phorate, and terbufos). The complete CTD exposure data file was downloaded (<http://ctdbase.org/downloads/#exposureevents>) and sorted to identify diseases associated with each pesticide exposure and whether the relationship was a "positive correlation" or "prediction/hypothesis". Similarly, diseases associated with each of the 18 pesticides from core CTD data were downloaded and filtered to include only "M-type" (marker/mechanism) relationships. Separate analyses were conducted for each of the 18 pesticides, selecting 'Diseases' as the input type in part 1 of the *MyVenn* tool (<http://ctdbase.org/tools/myVenn.go>), and the respective disease sets generated from exposure and core curation entered in part 2 as Set 1 and Set 2, respectively. Results are described in Figure 6 for 10 of the 18 pesticides that showed differences between the two data sets.

**Table S1. Key data fields and counts for CTD exposure curation**

| Exposure Category              | Curation Field               | Vocabulary <sup>a</sup> | Validation Process                                                                       | Curated data type    | Counts <sup>b</sup>    |
|--------------------------------|------------------------------|-------------------------|------------------------------------------------------------------------------------------|----------------------|------------------------|
| <b>1. Curation Identifiers</b> | PubMed identification number | CV                      | pubMed ID, valid record must be processed for reference to be saved to database          | Articles reviewed    | 1,712                  |
|                                | Curatable?                   | CV                      | must be yes/no                                                                           | Articles curated     | <b>1,067</b>           |
|                                | Study title                  | FT/SD                   |                                                                                          | Study titles         | 216                    |
|                                | Study years                  | CV                      | numerical value, collection start year must be less than or equal to collection end year |                      | 44,526                 |
|                                | Author email                 | FT                      | field not blank; format conforms to apache common email validation function              |                      | 1,037                  |
|                                | Influencing health factors   | CV                      | values match CTD controlled vocabulary                                                   | Influencing factors  | 11                     |
|                                | Author summary               | FT                      |                                                                                          | Author statements    | <b>1,067</b>           |
| <b>2. Stressor</b>             | Chemical stressor            | CV                      | must be a valid CTD vocabulary chemical name                                             | Chemical stressors   | <b>609<sup>c</sup></b> |
|                                | Stressor source              | CV                      | values match CTD controlled vocabulary                                                   | Stressor categories  | 6                      |
|                                | Stressor details             | FT                      |                                                                                          |                      | 20,269                 |
|                                | Stressor notes               | FT                      |                                                                                          |                      | 7,482                  |
| <b>3. Receptor</b>             | Number of receptors          | CV                      | must be numeric                                                                          |                      | 40,404                 |
|                                | Receptor                     | CV                      | values match CTD controlled vocabulary                                                   | Receptor types       | <b>12</b>              |
|                                | Smoking status               | CV                      | values match CTD controlled vocabulary                                                   | Smoking status types | 4                      |
|                                | Age                          | CV                      | must be single numeric value or valid range format                                       |                      | 34,202                 |
|                                | Gender                       | CV                      | values match CTD controlled vocabulary                                                   | Genders              | 2                      |
|                                | Race/ethnicity               | CV                      | values match CTD controlled vocabulary of PhenX terms                                    | Race categories      | 27                     |
|                                | Receptor notes               | FT                      |                                                                                          |                      | 20,609                 |

|            |                                   |       |                                                                                                                                                                 |                              |                               |
|------------|-----------------------------------|-------|-----------------------------------------------------------------------------------------------------------------------------------------------------------------|------------------------------|-------------------------------|
| 4. Event   | Methods                           | FT/SD |                                                                                                                                                                 | Methods                      | 477                           |
|            | Limit of detection                | CV    | if present, must be single numeric value or valid range format                                                                                                  |                              | 18,319                        |
|            | Detection frequency               | CV    | numeric value, must be < or = 100%                                                                                                                              |                              | 17,106                        |
|            | Medium assayed                    | FT/SD |                                                                                                                                                                 | Media types assayed          | <b>154</b>                    |
|            | Chemical or gene marker           | CV    | must be a valid CTD vocabulary chemical or gene name                                                                                                            | Chemicals/genes              | <b>621<sup>c</sup> and 71</b> |
|            | Exposure marker measurement level | CV    | if present, must contain valid single numeric value, range, equal <LOD or equal <value1-value2 and contain LOD value and measurement units in respective fields | Exposure marker measurements | <b>51,982</b>                 |
|            | Measurement units                 | FT/SD | must be present if marker measurement value is present                                                                                                          | Measurement units            | <b>285</b>                    |
|            | Measurement statistical category  | FT/SD |                                                                                                                                                                 | Statistical categories       | <b>370</b>                    |
|            | Assay notes                       | FT    |                                                                                                                                                                 |                              | 21,450                        |
|            | Country                           | CV    | values match CTD controlled vocabulary from ISO 3166 table                                                                                                      | Countries reported           | 98                            |
|            | State (US) or province            | CV    | values match US state abbreviations                                                                                                                             | US states reported           | <b>49</b>                     |
|            | Geographic details                | FT    |                                                                                                                                                                 |                              | 28,896                        |
|            | Event notes                       | FT    |                                                                                                                                                                 |                              | 5,107                         |
| 5. Outcome | Outcome correlation               | CV    | values match CTD controlled vocabulary                                                                                                                          | Outcome statements           | 2,901                         |
|            | Disease or phenotype              | CV    | must be a valid CTD vocabulary disease name                                                                                                                     | Diseases/phenotypes          | <b>245 and 146</b>            |
|            | Anatomical site of phenotype      | CV    | must be a valid CTD vocabulary anatomy name                                                                                                                     | Anatomical terms             | 44                            |
|            | Outcome notes                     | FT    |                                                                                                                                                                 |                              | 524                           |

<sup>a</sup>CV = controlled vocabulary; FT = free text; SD = standardizing

<sup>b</sup>as of August 2015; data in bold are currently available in download file

<sup>c</sup>Stressors denote chemicals used in an exposure event, while chemical markers include one or more metabolites of the chemical stressors

## References

Alavanja MC, Sandler DP, McMaster SB, Zahm SH, McDonnell CJ, Lynch CF, et al. 1996. The agricultural health study. *Environ Health Perspect* 104:362-369.

Davis AP, Wieggers TC, Rosenstein MC, Murphy CG, Mattingly CJ. 2011. The curation paradigm and application tool used for manual curation of the scientific literature at the comparative toxicogenomics database. *Database (Oxford)* 2011:bar034.
